# Supplementary material for: Transgenic ferret models define pulmonary ionocyte diversity and function
Source: Springer Nature journal article supplement (doi:10.1038/s41586-023-06549-9), 2023-09-20
Supplement: MOESM1 [file 41586_2023_6549_MOESM1_ESM.pdf]

---

**Supplementary information**

---

**Transgenic ferret models define pulmonary ionocyte diversity and function**

---

In the format provided by the  
authors and unedited

# Supplementary Information Figure 1: Raw Data Gels

WT: WT ferret Kidney lysate; KO: *FOXI1*-KO ferret Kidney lysate; B: Blank

Device: Biorad WB  
Gel: 8% Gel  
Denature: 95°C, 5 mins  
Electrophoresis:  
80V, 20 mins; 100V, 1hr  
Transfer:  
200 mA, 90 mins, on ice

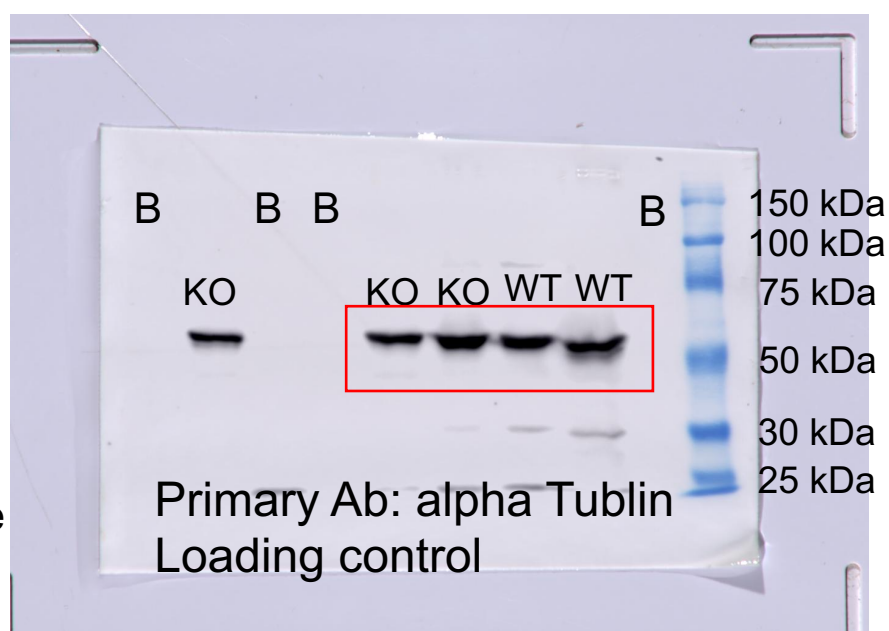

Controls were run on the same gel as loading control. Red rectangle indicates how gels were cropped for final figure.

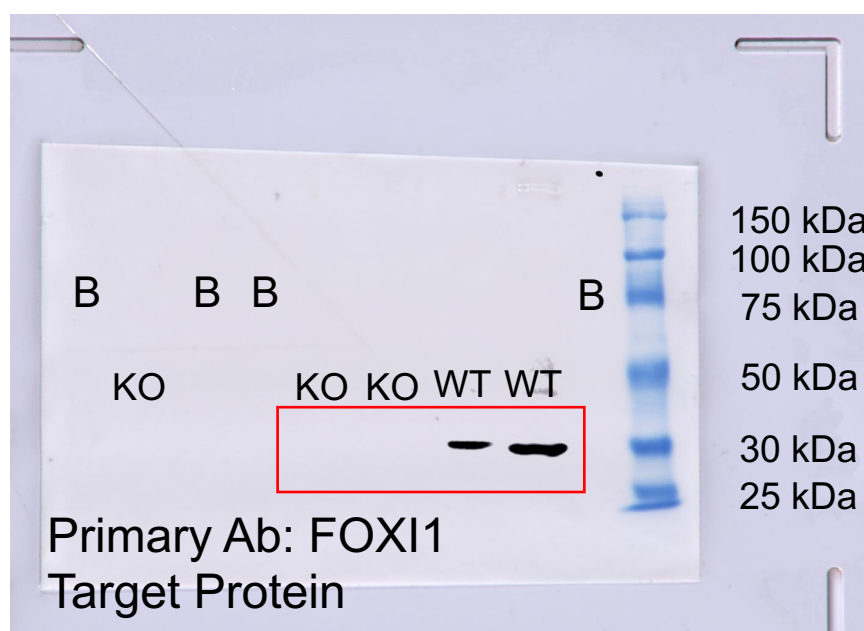

**SI Figure 1:** Uncropped images of Western blots. Kidney tissue lysates from *FOXI1*-KO and WT animals were collected and subjected to Western blotting with FOXI1 antibody. n = 2 ferret donors in WT group; n = 3 ferret donors in *FOXI1*-KO group.

# Supplementary Information Figure 2: *FOXI1*-lineage cells enrichment gate strategy

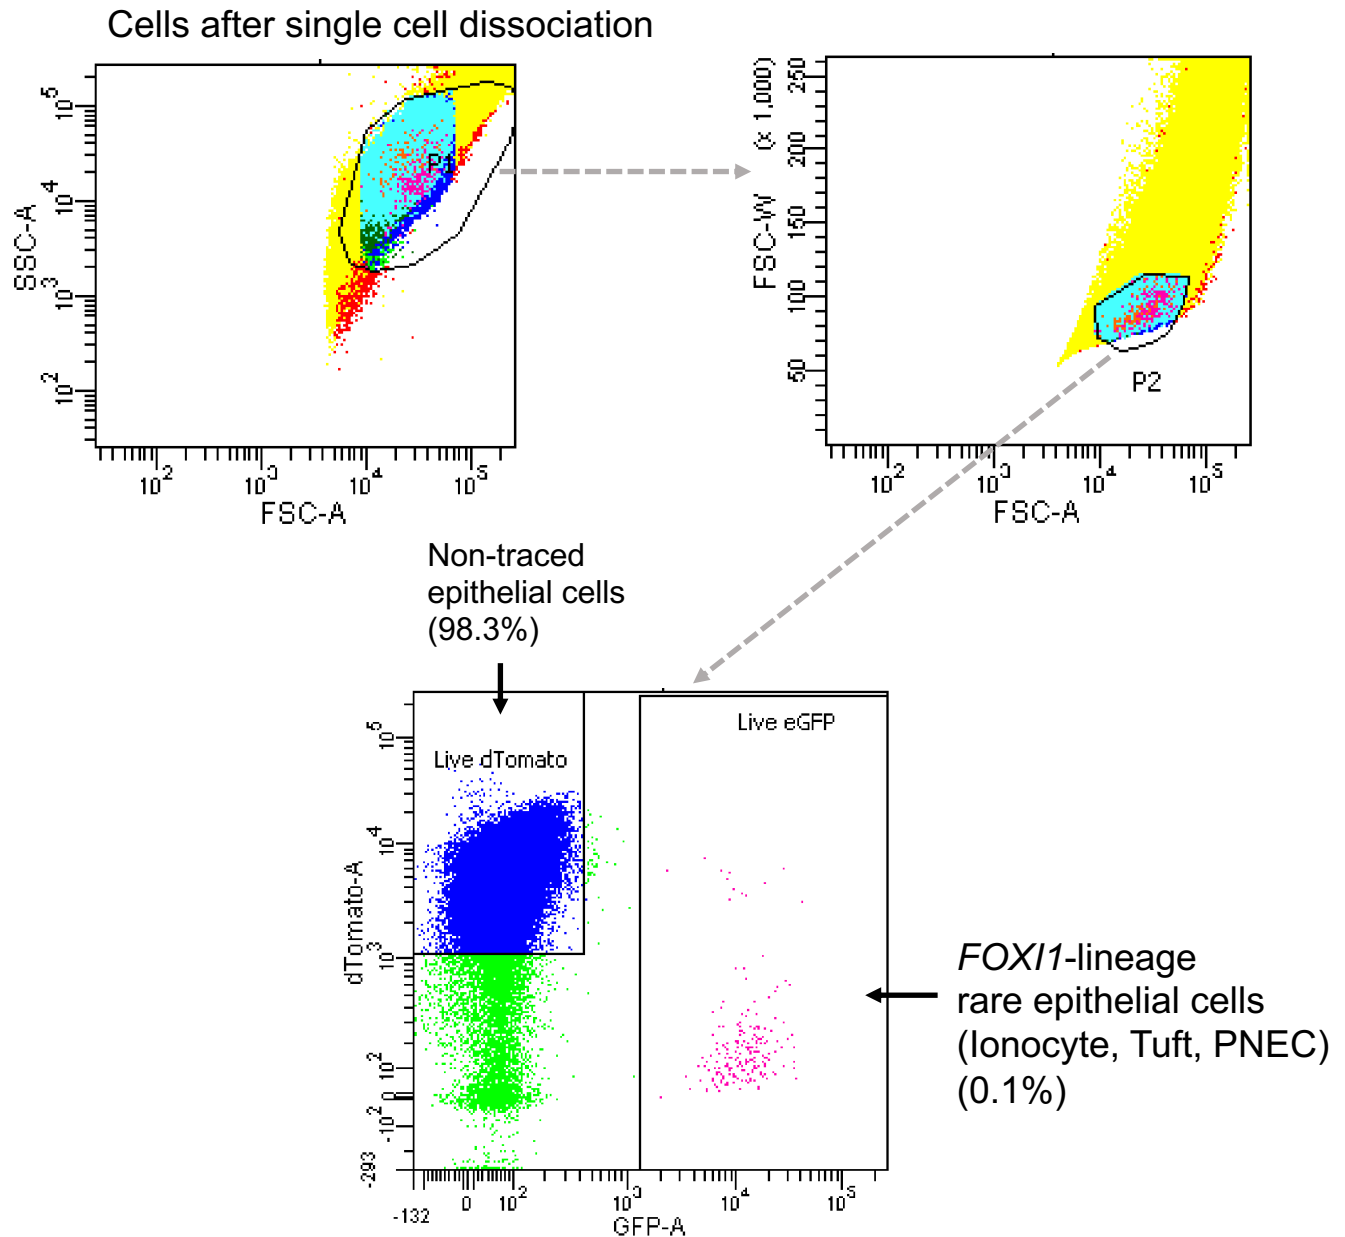

**SI Figure 2:** Gating strategy to sort *FOXI1*-lineage (eGFP positive) cells from non-traced epithelial cells. ALI cultures were from ROSA TG:: *FOXI1*-Cre<sup>ERT2</sup> ferrets and *FOXI1*-lineage (eGFP positive) cells were induced with hydroxytamoxifen.
